# Supplementary material for: Periodic Exposure of Plasma-Activated Medium Alters Fibroblast Cellular Homoeostasis
Source: MDPI journal article supplement (doi:10.3390/ijms23063120), 2022-03-14
Supplement: s1 [file s1]

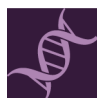

Supplementary Information

# Periodic Exposure of Nonthermal Plasma Activated Medium Impairs Fibroblast Cellular Homoeostasis

Pradeep Bhartiya <sup>1</sup>, Neha Kaushik <sup>2</sup>, Linh N. Nguyen <sup>1</sup>, Sander Bekeschus <sup>3</sup>, Kai Masur <sup>3</sup>, Klaus-Dieter Weltmann <sup>3</sup>, Nagendra K. Kaushik <sup>1,\*</sup>, Eun H. Choi <sup>1,\*</sup>

<sup>1</sup> Department of Electrical and Biological Physics, Plasma Bioscience Research Center, Kwangwoon University, Seoul 01897, Korea; pradeepindian65@gmail.com (P.B.); nhathlinhusth@gmail.com (L.N.N.)

<sup>2</sup> Department of Biotechnology, College of Engineering, The University of Suwon, Hwaseong 18323, Korea; neha.bioplasma@gmail.com

<sup>3</sup> Laboratory of Plasma Technology, Institute of Materials Science, Vietnam Academy of Science and Technology, 18 Hoang Quoc Viet, Hanoi 100000, Vietnam

<sup>4</sup> ZIK Plasmatis, Leibniz Institute for Plasma Science and Technology, 17489 Greifswald, Germany; sander.bekeschus@inp-greifswald.de (S.B.); kai.masur@inp-greifswald.de (K.M.); weltmann@inp-greifswald.de (K.-D.W.)

\* Correspondence: kaushik.nagendra@kw.ac.kr (N.K.K.); ehchoi@kw.ac.kr (E.H.C.)

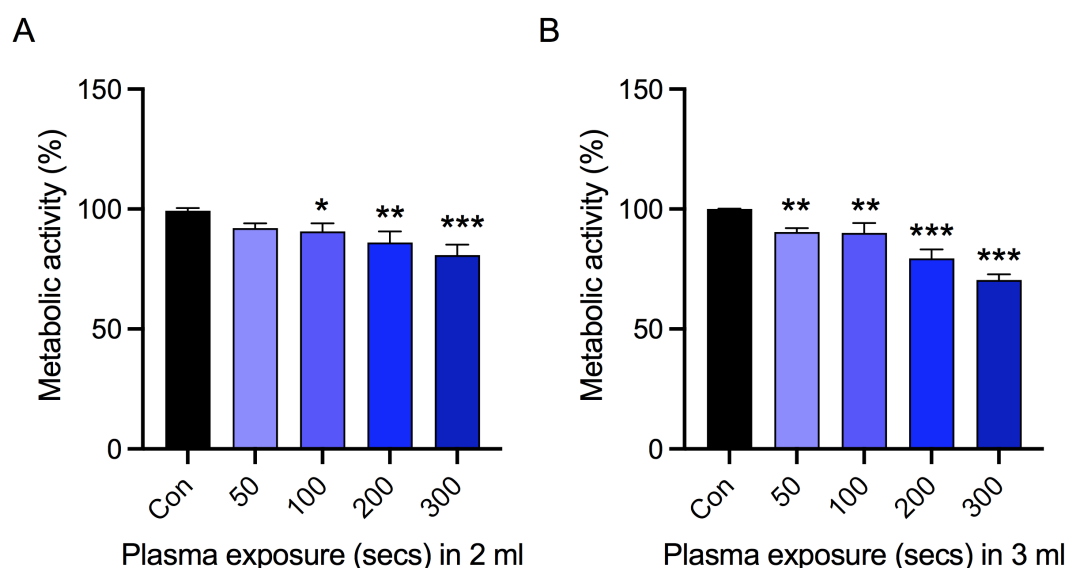

**Figure S1.** Standardization of plasma exposure time. Measurement of metabolic activity (percentage) in GM cells after exposure to nonthermal plasma for indicated exposure times in (A) 2 ml and (B) 3 ml of complete MEM medium. Statistical significance was evaluated using one-way ANOVA using Dunnett's multiple comparison test and is indicated as \* $p < 0.05$ , \*\* $p < 0.01$  and \*\*\* $p < 0.001$ .

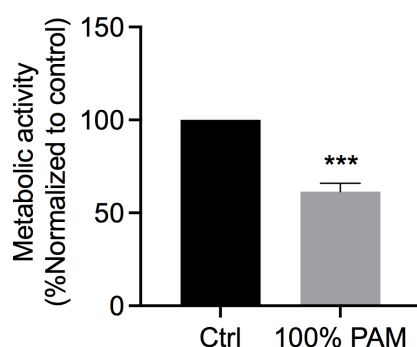

**Figure S2.** Evaluation of cytotoxicity in fibroblast cells after PAM treatment. Representative graph showing metabolic activity levels in GM cells after PAM treatment. Statistical significance was evaluated using Two-tailed unpaired parametric t-test and denoted as \*\*\* $p < 0.001$ .

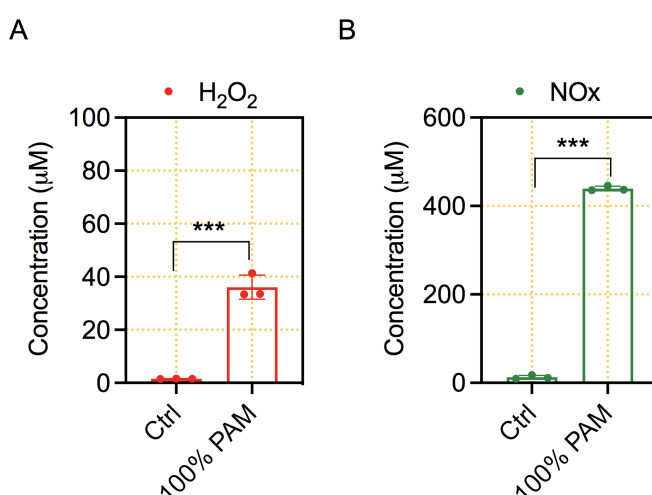

**Figure S3.** Measurement of reactive species in PAM which was used to treat fibroblast cells. Representative graphs indicating levels of (A)  $\text{H}_2\text{O}_2$  and (B)  $\text{NO}_x$  in PAM. Significance was evaluated using Two-tailed unpaired parametric t-test and indicated as \*\*\* $p < 0.001$ .

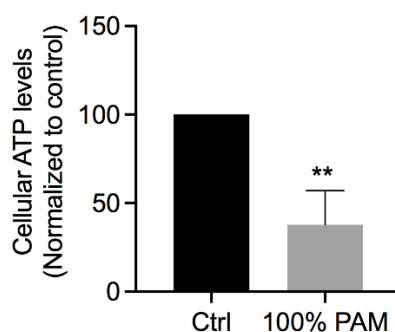

**Figure S4.** Evaluation of ATP levels in fibroblast cells. Representative graph indicating changes in ATP levels in control and PAM treated GM cells. Statistical significance was evaluated using Two-tailed unpaired parametric t-test and is denoted as \*\* $p < 0.01$ .

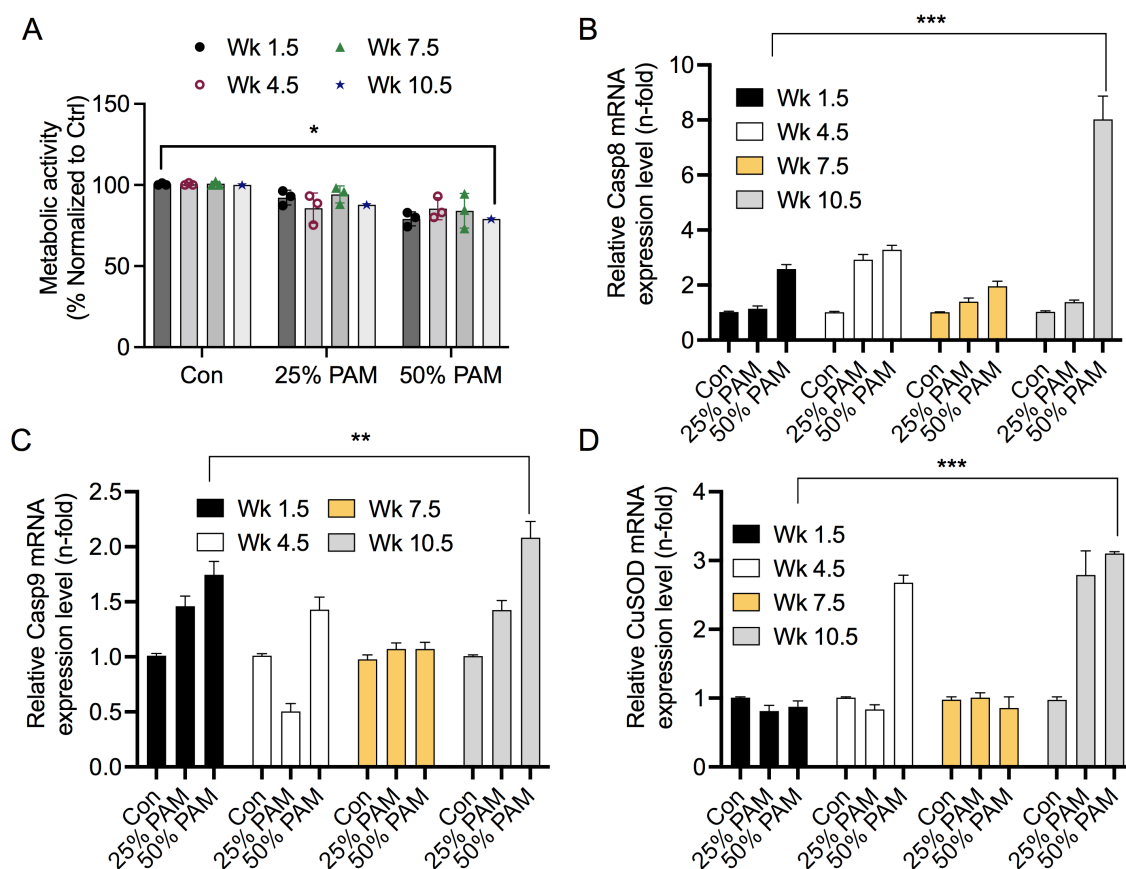

**Figure S5.** Effect of periodic exposure at intermediate weeks on fibroblast cells. **(A)** Bar graph representing metabolic activity of fibroblasts after periodic PAM exposure for intermediate weeks (Wks). Evaluation of cell death markers **(B)** Casp8 and **(C)** Casp9 in fibroblasts after periodic stress at intermediate Wk. **(D)** Graph indicating mRNA expression levels of CuSOD after periodic exposure for intermediate week timepoints. Statistical significance was evaluated using two-way ANOVA using Tukey's multiple comparison test and is indicated as \* $p < 0.05$ , \*\* $p < 0.01$ , and \*\*\* $p < 0.001$ .
